# Supplementary material
Source: PubMed Central journal article supplement (PMC4310632)
Supplement: nn504508s_si_001.pdf [file nn504508s_si_001.pdf]

**Supporting Information for:**

**Triggering of RNA Interference with RNA-RNA, RNA-DNA and DNA-RNA Nanoparticles**

**Authors:** Kirill A. Afonin, Mathias Viard, Ioannis Kagiampakis, Christopher L. Case, Marina A. Dobrovolskaia, Jen Hofmann, Ashlee Vrzak, Maria Kireeva, Wojciech K. Kasprzak, Vineet N. KewalRamani, Bruce A. Shapiro

## Sequences used in this project

All DNAs and fluorescently labeled RNA and DNA molecules were purchased from IDT (<http://www.idtdna.com/site>)

### RNA cube<sup>1</sup> 3'-end functionalized with antisense of Dicer substrate RNA (DS RNA) selected against eGFP<sup>2</sup>

Letter sequences below the RNA strands indicate the desired interactions between different strands. Dots indicate the parts of the strands that are per design single-stranded. Sequence characters in upper case represent the cube scaffold; Dicer substrate (DS) RNAs are denoted in lower case.

#### DS\_A

GGCAACUUUGAUCCCUCGGUUUAGCGCCGGCCUUUUCUCCCACACUUUCACGuucgguggugca  
gaugaacuucaggguca  
MMMMMM...KKKKKKLLLL...FFFFFFGGGG...BBBBBBCCCC...NNNN...ZZZZZZZZZZ  
ZZZZZZZZZZZZZZZZZZ..

#### DS\_B

GGGAAAUUUCGUGGUAGGUUUUGUUGCCCGUGUUUCUACGAUUACUUUGGUCuucgguggugca  
gaugaacuucaggguca  
QQQQQQ...PPPPPPPPPP...MMMMMMNNNN...EEEEEEEEEE...RRRR...ZZZZZZZZZZ  
ZZZZZZZZZZZZZZZZZZ..

#### DS\_C

GGACAUUUUCGAGACAGCAUUUUUCCCGACCUUUGCGGAUUGUAUUUUAGGuucgguggugca  
gaugaacuucaggguca  
IIIIII...OOOOOOOOOO...QQQQQQRRRR...DDDDDDDDDD...JJJJ...ZZZZZZZZZZ  
ZZZZZZZZZZZZZZZZZZ..

#### DS\_D

GGCGCUUUUGACCUUCUGCUUUAUGUCCCCUAUUUCUUAUGACUUUUGGCCuucgguggugca  
gaugaacuucaggguca  
FFFFFF...HHHHHHHHHH...IIIIIIJJJJ...AAAAAAAAAA...GGGG...ZZZZZZZZZZ  
ZZZZZZZZZZZZZZZZZZ..

#### DS\_E

GGGAGAUUUAGUCAUUAAGUUUUACAAUCCGCUUUGUAAUCGUAGUUUGUGUuucgguggugca  
gaugaacuucaggguca  
BBBBBB...AAAAAAAAAA...DDDDDDDDDD...EEEEEEEEEE...CCCC...ZZZZZZZZZZ  
ZZZZZZZZZZZZZZZZZZ..

#### DS\_F

GGGAUCUUUACCUACCACGUUUUGCUGUCUCGUUUGCAGAAGGUCUUUCCGAuucgguggugca  
gaugaacuucaggguca  
KKKKKK...PPPPPPPPPP...OOOOOOOOOO...HHHHHHHHHH...LLLL...ZZZZZZZZZZ  
ZZZZZZZZZZZZZZZZZZ..

#### DS RNA sense

pACCCUGAAGUUCAUCUGCACCACCG  
ZZZZZZZZZZZZZZZZZZZZZZZZZZZZ

## DS RNA antisense

CGGUGGUGCAGAUGAACUUCAGGGUCA

## RNA cube 3'-end functionalized with antisense of Dicer substrate RNA (DS RNA) selected against multiple sites (indicated in parenthesis) of HIV-1<sup>3</sup>

### DS\_A (Primer Binding Site - Matrix)

GGCAACUUUGAUCCCUCGGUUUAGCGCCGGCCUUUCUCCCACACUUUCACGuu  
gacggacucgcacccaucucucuccuu  
MMMMMM...KKKKKKLLLL...FFFFFFGGGG...BBBBBBCCCC...NNNN...SSSSSSSSSS  
SSSSSSSSSSSSSSSS..

### DS\_B (NEF)

GGGAAAUUUCGUGGUAGGUUUUGUUGCCCGUGUUUCUACGAUUACUUUGGUCuuggaggaaauu  
agcccuuccaguccuu  
QQQQQQ...PPPPPPPPP...MMMMMNNNN...EEEEEEEEEE...RRRR...TTTTTTTTTT  
TTTTTTTTTTTTTTTTTT..

### DS\_C (Protease)

GGACAUUUUCGAGACAGCAUUUUUCCCGACCUUUGCGGAUUGUAUUUUAGGuuucuucuaaua  
cuguaucaucugcuccu  
IIIIII...OOOOOOOOO...QQQQQQRRRR...DDDDDDDDDD...JJJJ...XXXXXXXXXX  
XXXXXXXXXXXXXXXXXX..

### DS\_D (ENV)

GGGCGUUUUGACCUUCUGCUUUAUGUCCCCUAUUUCUUAUGACUUUUGGCCuuggacaauugg  
agaagugaauuauuu  
FFFFFF...HHHHHHHHH...IIIIIIJJJJ...AAAAAAAAA...GGGG...ZZZZZZZZZZ  
ZZZZZZZZZZZZZZ..

### DS\_E (Capsid)

GGGAGAUUUAGUCAUUAAGUUUACAAUCCGCUUUGUAAUCGUAGUUUGUGUuuccuggaugc  
ugucaucauuucuucuu  
BBBBBB...AAAAAAAAA...DDDDDDDDDD...EEEEEEEEEE...CCCC...WWWWWWWWW  
WWWWWWWWWWWWWW..

### DS\_F (RT)

GGGAUCUUUACCUACCACGUUUUGCUGUCUCGUUUGCAGAAGGUCUUUCCGAuuauuuauacuac  
uuguucauuuccucca  
KKKKKK...PPPPPPPPP...OOOOOOOOO...HHHHHHHHH...LLLL...CCCCCCCCC  
CCCCCCCCCCCCC..

## Corresponding sense strands

### DS (Primer Binding Site - Matrix)

5'-pGGAGAGAGAUGGGUGCGAGUUCGUC  
SSSSSSSSSSSSSSSSSSSSSSSSSSSSSS

### DS (NEF)

5'-pGGGACUGGAAGGGCUAAUUUUCUCC  
TTTTTTTTTTTTTTTTTTTTTTTTTTTTTT

**DS (PRO)**

5'-pGAGCAGAUGAUACAGUAUUAGAAGA  
 XXXXXXXXXXXXXXXXXXXXXXXXXX

**DS (ENV)**

5'-pUAUAAUUCACUUCUCCAAUUGUCC  
 ZZZZZZZZZZZZZZZZZZZZZZZZZ

**DS (Capsid)**

5'-pGAAGAAUGAUGACAGCAUUUCAGG  
 WWWWWWWWWWWWWWWWWWWWWWW

**DS (RT)**

5'-pGAGGAAUGAACAAGUAGAUAAAU  
 CCCCCCCCCCCCCCCCCCCCCCCC

**DNA sequences designed for auto-recognizing RNA-DNA hybrids against eGFP<sup>4</sup>**

Auto-recognizing toeholds are underlined.

**DNA for antisense of eGFP DS RNA** (hybrids for assembly with 3'-end functionalized RNA cubes)

Alexa546-GTCACGGTCTCCTGACCCTGAAGTTCATCTGCACCACCG

**DNA for sense of eGFP DS RNA** (cognate hybrids for 3'-end functionalized RNA cubes)

CGGTGGTGCAGATGAAGTTCAGGGTCAGGAGACCGTGAC-Alexa488

**DNA cube with three Ts at each corner****A**

GGCAACTTTGATCCCTCGGTTTAGCGCCGGCCTTTTCTCCACACTTTCACG  
 MMMMM...KKKKKKLLLL...FFFFFFGGGG...BBBBBBCCCC...NNNN

**B**

GGGAAATTTTCGTGGTAGGTTTTGTTGCCCGTGTTTCTACGATTACTTTGGTC  
 QQQQQQ...PPPPPPPPP...MMMMMNNNN...EEEEEEEEEE...RRRR

**C**

GGACATTTTCGAGACAGCATTTTTTCCCGACCTTTGCGGATTGTATTTTAGG  
 IIIIII...OOOOOOOOO...QQQQQQRRRR...DDDDDDDDDD...JJJJ

**D**

GGCGCTTTTGACCTTCTGCTTTATGTCCCCTATTTCTTAATGACTTTTGGCC  
 FFFFFF...HHHHHHHHH...IIIIIIJJJJ...AAAAAAAAA...GGGG

**E**

GGGAGATTTAGTCATTAAGTTTTACAATCCGCTTTGTAATCGTAGTTTGTGT  
 BBBBBB...AAAAAAAAA...DDDDDDDDDD...EEEEEEEEEE...CCCC

**F**

GGGATCTTTACCTACCACGTTTTGCTGTCTCGTTTGCAGAAGGTCTTTCCGA  
 KKKKKK...PPPPPPPPP...OOOOOOOOO...HHHHHHHHH...LLLL

**DNA cube 5'-end functionalized with auto-recognizing RNA-DNA hybrids carrying sense strand of DS RNA selected against eGFP**

Auto-recognizing toeholds are underlined.

**A**

GGAGACCGTGACCGGTGGTGCAGATGAACTTCAGGGTCAttGGCAACTTTGATCCCTCGGTTTA  
GCGCCGGCCTTTTCTCCCACACTTTCACG

**B**

GGAGACCGTGACCGGTGGTGCAGATGAACTTCAGGGTCAttGGGAAATTTTCGTGGTAGGTTTTG  
TTGCCCGTGTTTCTACGATTACTTTGGTC

**C**

GGAGACCGTGACCGGTGGTGCAGATGAACTTCAGGGTCAttGGACATTTTCGAGACAGCATTTT  
TTCCCGACCTTTGCGGATTGTATTTTAGG

**D**

GGAGACCGTGACCGGTGGTGCAGATGAACTTCAGGGTCAttGGCGCTTTTGACCTTCTGCTTTA  
TGTCCCCTATTTCTTAATGACTTTTGGCC

**E**

GGAGACCGTGACCGGTGGTGCAGATGAACTTCAGGGTCAttGGGAGATTTAGTCATTAAGTTTT  
ACAATCCGCTTTGTAATCGTAGTTTGTGT

**F**

GGAGACCGTGACCGGTGGTGCAGATGAACTTCAGGGTCAttGGGATCTTTACCTACCACGTTTT  
GCTGTCTCGTTTGCAGAAGGTCTTTCCGA

**DNA for antisense of eGFP DS RNA** (cognate hybrids for 5'-end functionalized DNA cubes)

TGACCCTGAAGTTCATCTGCACCACCGGTCACGGTCTCC

**DNA cube 3'-end functionalized with auto-recognizing RNA-DNA hybrids carrying antisense strand of DS RNA selected against eGFP**

**A**

GGCAACTTTGATCCCTCGGTTTAGCGCCGGCCTTTTCTCCCACACTTTCACGttTGACCCTGAA  
GTTTCATCTGCACCACCGGTCACGGTCTCC

**B**

GGGAAATTTTCGTGGTAGGTTTTGTTGCCCGTGTTTCTACGATTACTTTGGTCttTGACCCTGAA  
GTTTCATCTGCACCACCGGTCACGGTCTCC

**C**

GGACATTTTCGAGACAGCATTTTTTCCCGACCTTTGCGGATTGTATTTTAGGttTGACCCTGAA  
GTTTCATCTGCACCACCGGTCACGGTCTCC

**D**

GGCGCTTTTGACCTTCTGCTTTATGTCCCCTATTTCTTAATGACTTTTGGCCttTGACCCTGAA  
GTTTCATCTGCACCACCGGTCACGGTCTCC

**E**

GGGAGATTTAGTCATTAAGTTTTACAATCCGCTTTGTAATCGTAGTTTGTGTttTGACCCTGAA  
GTTTCATCTGCACCACCGGTCACGGTCTCC

**F**

GGGATCTTTACCTACCACGTTTTGCTGTCTCGTTTGCAGAAGGTCTTTCCGAttTGACCCTGAA  
GTTTCATCTGCACCACCGGTCACGGTCTCC

**DNA for sense of eGFP DS RNA** (cognate hybrids for 3'-end functionalized DNA cubes)

GGAGACCGTGACCGGTGGTGCAGATGAACTTCAGGGTCA

### Fluorescently labeled RNA and DNA molecules

**DS RNA sense 3'-end labeled with Alexa488**

pACCCUGAAGUUCAUCUGCACCACCG-Alexa488

ZZZZZZZZZZZZZZZZZZZZZZZZZZZZZZ

**DS RNA antisense 5'-end labeled with Alexa546**

Alexa546-CGGUGGUGCAGAUGAACUUCAGGGUCA

**DNA for antisense of eGFP DS RNA** (hybrids for assembly with 3'-end functionalized RNA cubes) **5'-end labeled with Alexa546**

Alexa546-GTCACGGTCTCCTGACCCTGAAGTTCATCTGCACCACCG

**DNA for sense of eGFP DS RNA** (cognate hybrids for 3'-end functionalized RNA cubes) **3'-end labeled with Alexa488**

CGGTGGTGCAGATGAACTTCAGGGTCAGGAGACCGTGAC-Alexa488

### Sgc8c aptamers<sup>5,6</sup> for functionalization of RNA and DNA

Sgc8c aptamer part is in italic letters

**Sgc8c\_sense\_DNA\_cube**

ACCCTGAAGTTCATCTGCACCACCGATCTAACTGCTGCGCCGCCGGGAAAATACTGTACGGTTA  
GATGA

## Supporting Figures

(a) RNA cube functionalized with six DS RNAs

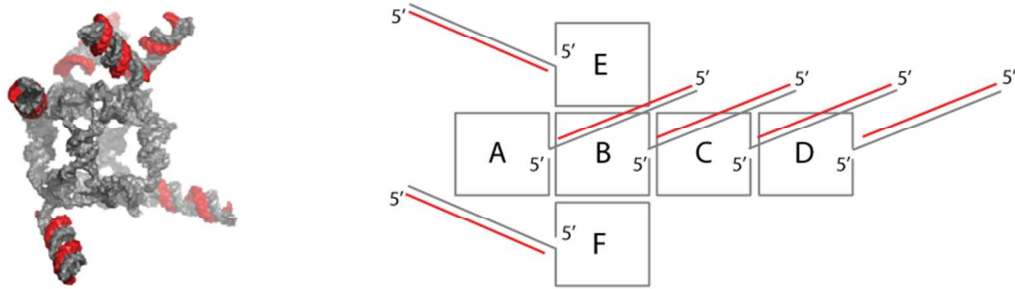

(b) RNA cube functionalized with six RNA-DNA hybrids

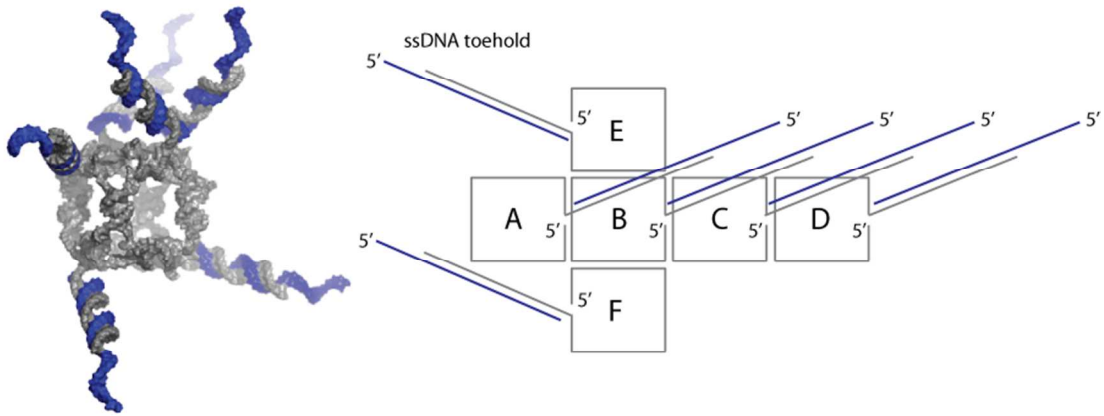

(c) DNA cube functionalized with six RNA-DNA hybrids

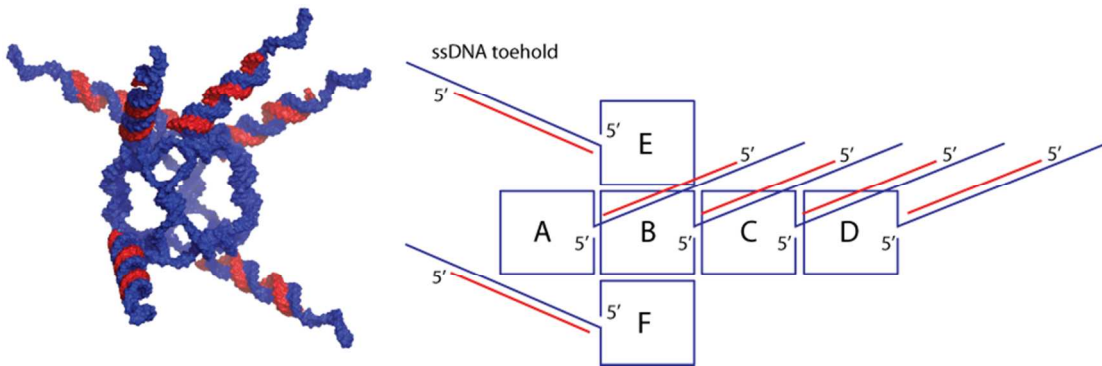

**Figure S1.** 3D models and corresponding 2D diagrams of RNA and DNA cubes functionalized through the 3'-side extensions of scaffold strands with six Dicer substrate siRNAs (DS RNAs) or RNA-DNA hybrids for conditional split function (RNAi) activation. RNA strands are colored in grey and red; DNA strands are in blue.

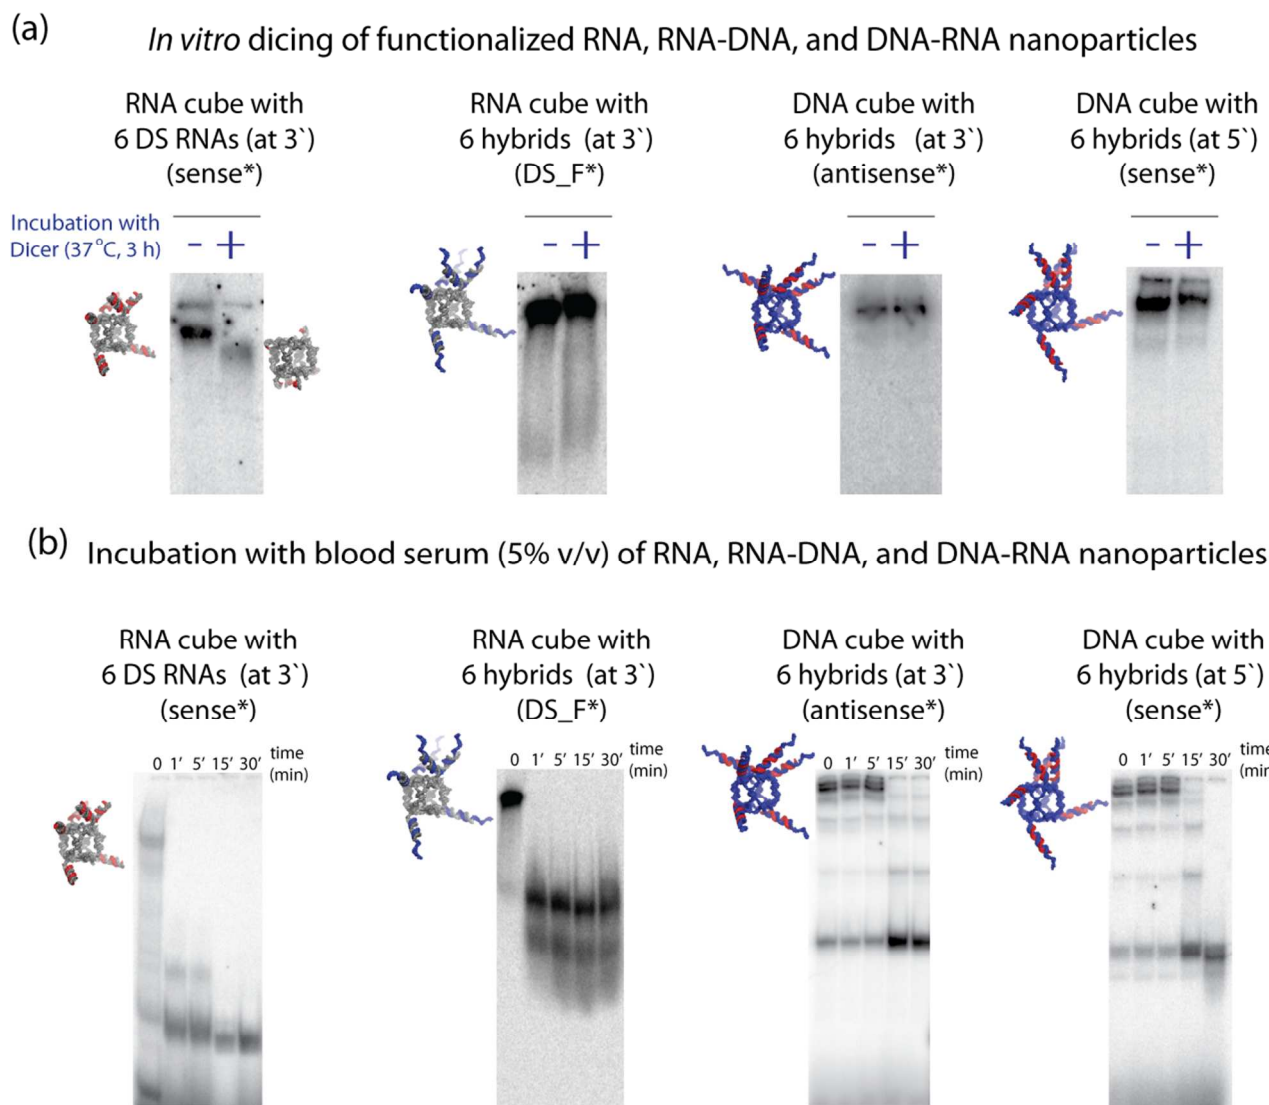

**Figure S2.** Dicing experiments shown in (a) and blood serum degradation assays shown in (b). Sense or antisense strands were radiolabeled with  $[^{32}\text{P}]\alpha\text{-GTP}$  at 3'-sides and "\*" indicate radiolabeled strands. Native-PAGE gels were used to identify the dicing products after incubation with Dicer (indicated with "+") for 3 hours at 37°C and degradation products after incubation with 5% human blood serum at different time points. Radiolabeled sense and antisense RNA strands (mixed with non-labeled RNAs) were added to the assembly mixture in 10% excess to guarantee a complete incorporation of radiolabels into the resulting cubes. The dicing of RNA cubes with six DS RNAs was also demonstrated in Afonin *et al*<sup>7</sup>.

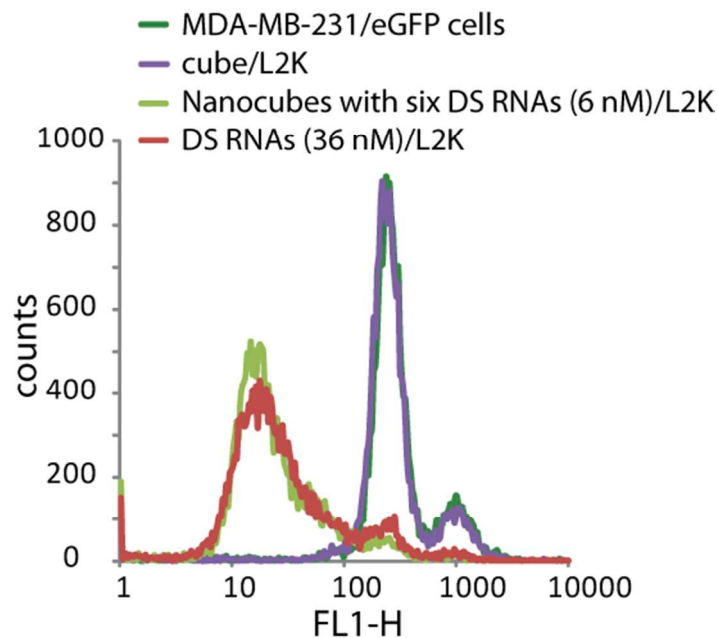

**Figure S3.** GFP knockdown assays with 3'-side functionalized RNA cubes for human breast cancer cells (MDA-MB-231/GFP) which stably express enhanced GFP (eGFP). Three after the transfection of cells with nanocubes, eGFP expression was statistically analyzed with flow cytometry experiments. As controls, non-functionalized RNA cube and individual DS RNA duplexes against eGFP were used.

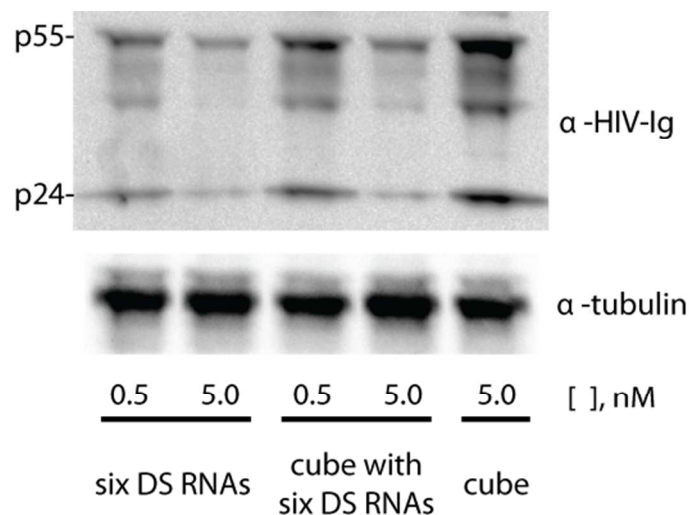

**Figure S4.** Western blot analysis using  $\alpha$ -HIV-Ig confirms that both 3'-functionalized RNA nanocubes and the mixture of DS RNAs reduce the level of p55 (Gag polyprotein) and p24 in the virus producing cells compared to non-functionalized nanocubes.

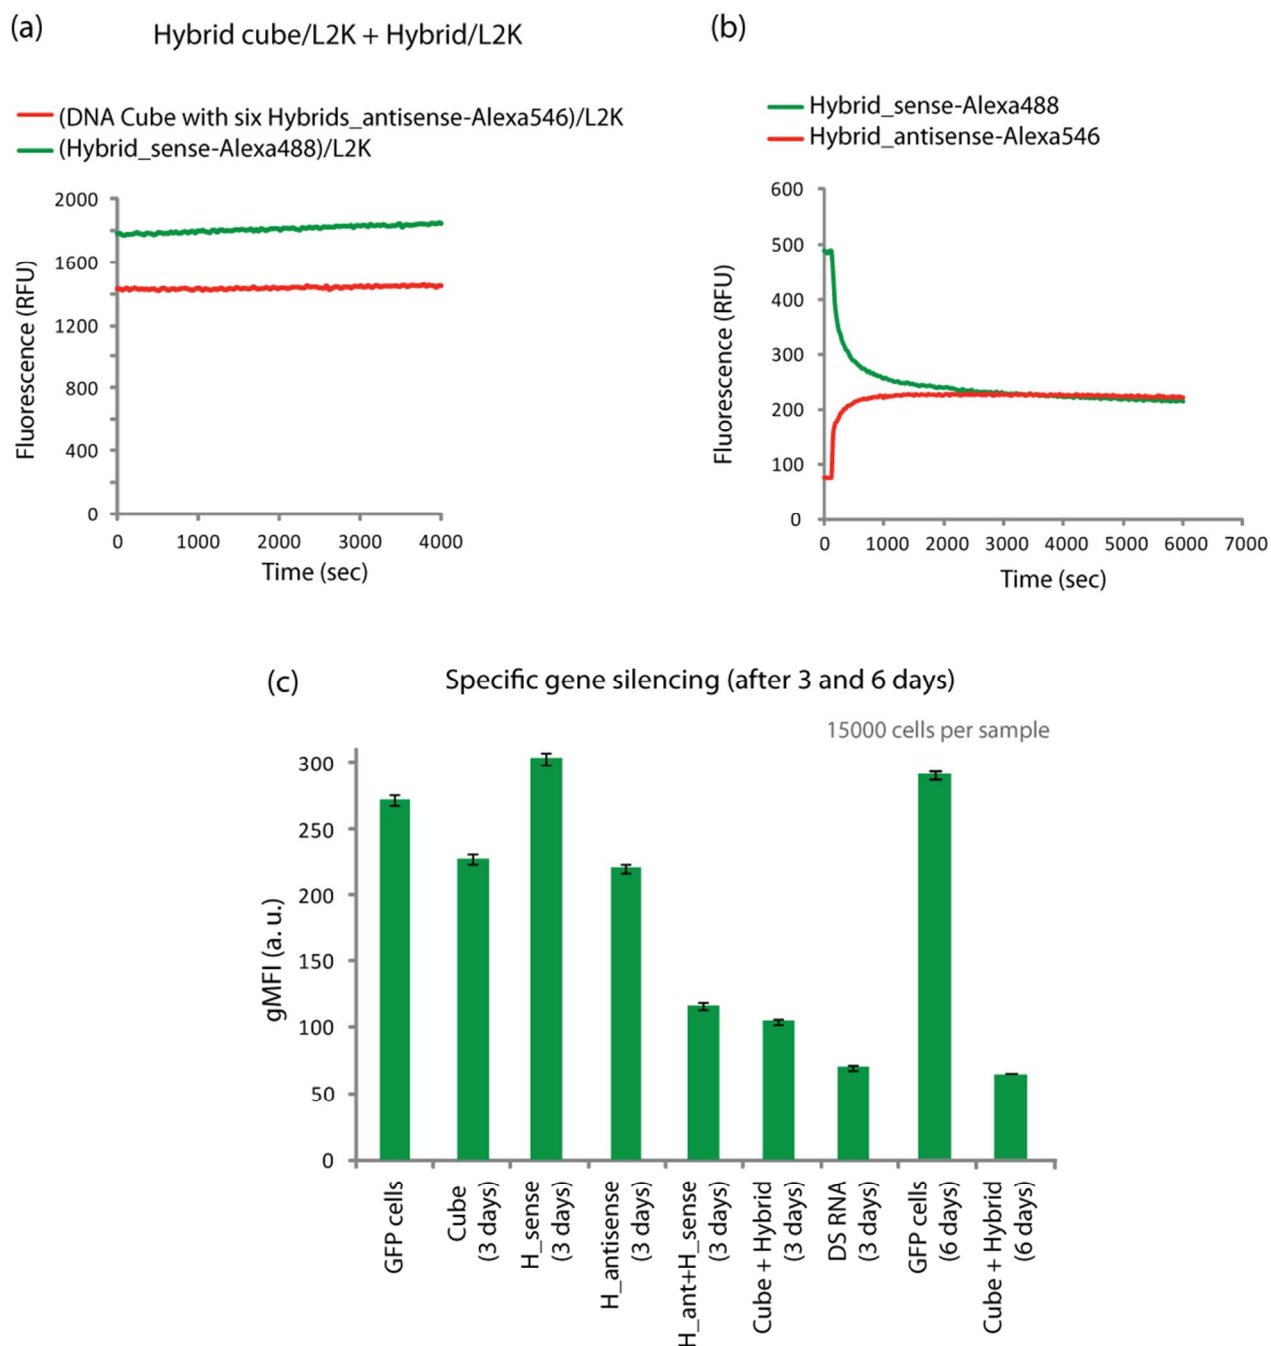

**Figure S5.** Activation of split functionalities with 3'-side functionalized DNA cubes carrying hybrids with antisenses of DS RNA and six cognate hybrids carrying sense strands of DS RNA. **(a)** Fluorescently labeled cubes and hybrids individually associated with L2K prior to mixing were followed by fluorescent time tracing. Please note that L2K forms complexes with cubes and hybrids thus, preventing their re-association. **(b)** FRET time traces during re-association of hybrids fluorescently labeled with Alexa488 and Alexa546. **(c)** GFP knockdown assays for human breast cancer cells expressing GFP (MDA-MB-231/GFP). Three and six days after the transfection of cells, eGFP expression was analyzed with flow cytometry experiments. As a control, siRNA duplexes against eGFP were used. Please note that the individual hybrids and DNA cubes decorated with hybrids cause no decrease in eGFP production. gMFI corresponds to the geometric mean fluorescence intensity. Error bars denote SEM

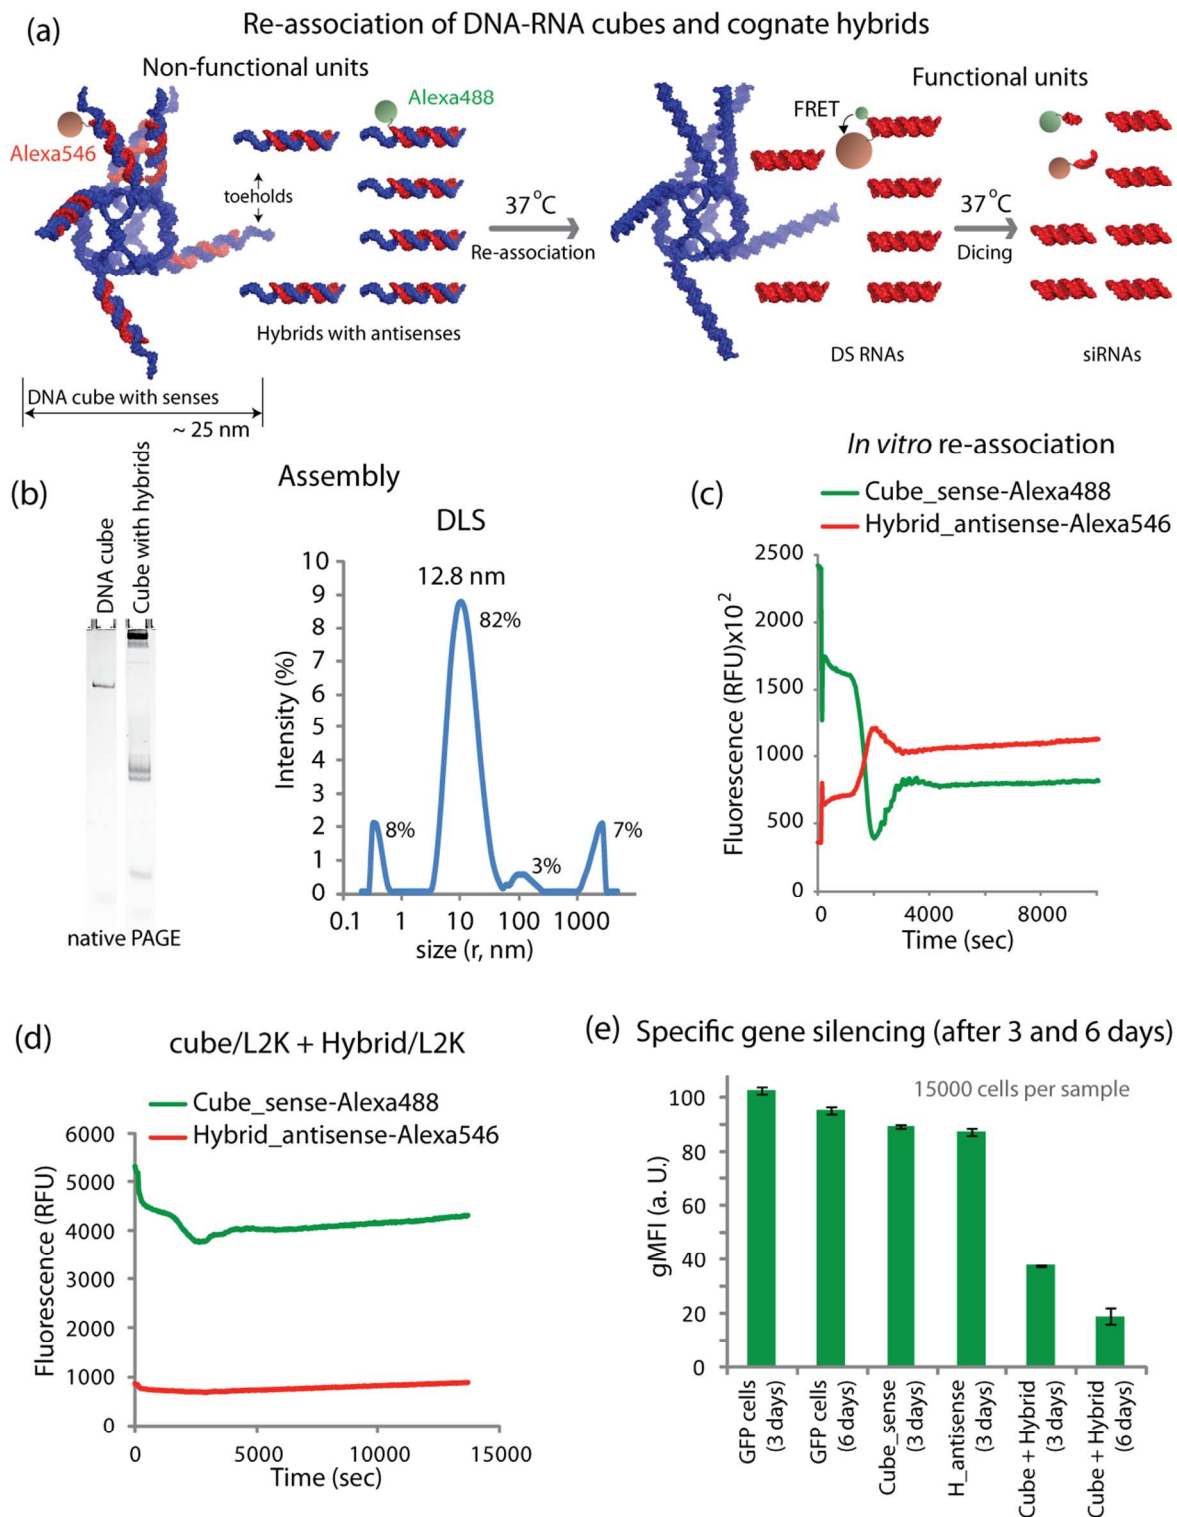

**Figure S6.** Activation of split functionalities with DNA cubes 5'-side decorated with RNA-DNA hybrids (carrying senses of DS RNA) and six cognate hybrids (carrying antisenses of DS RNA). **a)** Schematics of re-association and activation of FRET and RNAi. Preliminary modeling of cubic scaffolds with functionalized 5'-ends of the building strands indicates that RNA cubes may experience

structural collisions and entanglements in the self-assembly process, while the DNA-based cubes provide less sterically constraining scaffolds. **(b)** The formation of cubes was confirmed by total SYBR Gold staining native PAGE and DLS experiments. **(c)** FRET time traces during re-association of fluorescently labeled cubes and hybrids labeled with Alexa488 and Alexa546. **(d)** Fluorescently labeled cubes and hybrids individually associated with L2K prior to mixing were followed by fluorescent time tracing. Please note that L2K forms complexes with cubes and hybrids thus, preventing their re-association. **(e)** GFP knockdown assays for human breast cancer cells expressing enhanced GFP (MDA-MB-231/GFP). Three and six days after the transfection of cells, eGFP expression was analyzed with flow cytometry experiments. As the control, siRNA duplexes against eGFP were used. Please note that the individual hybrids and DNA cubes decorated with hybrids cause no decrease in eGFP production. gMFI corresponds to the geometric mean fluorescence intensity. Error bars denote SEM.

(a) IFN Activity

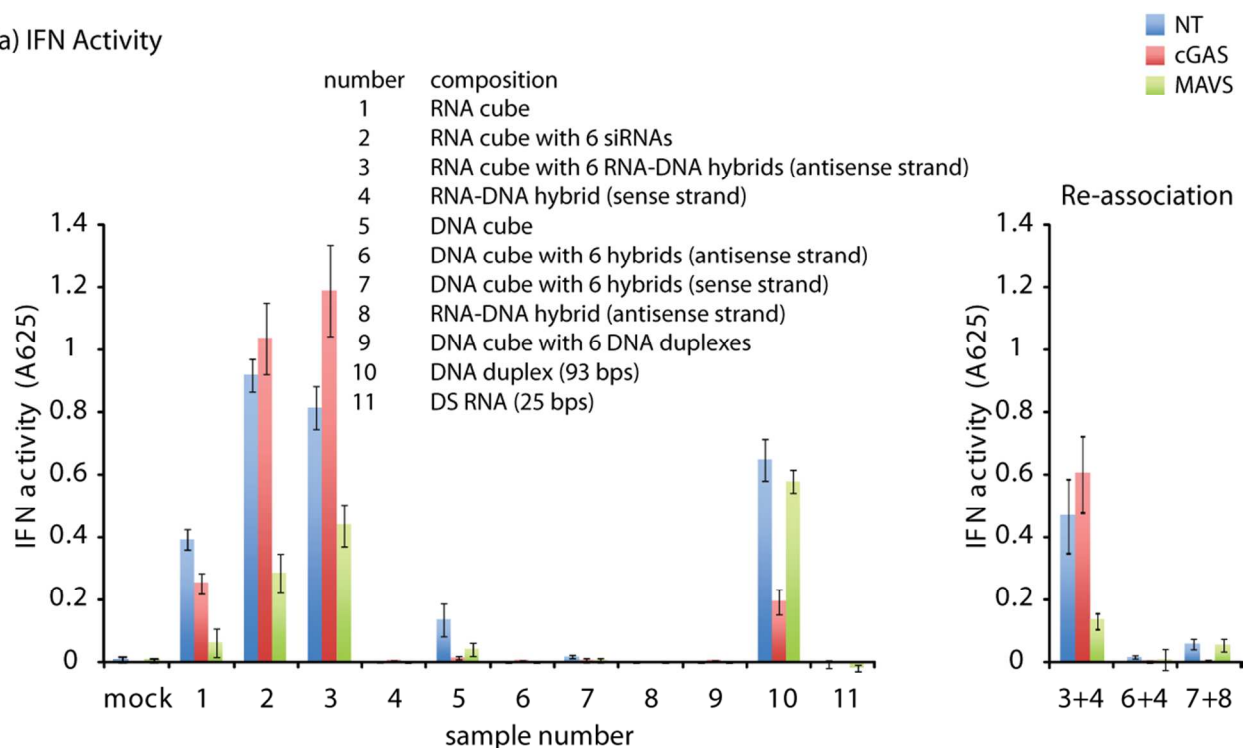

(b) Cell viability

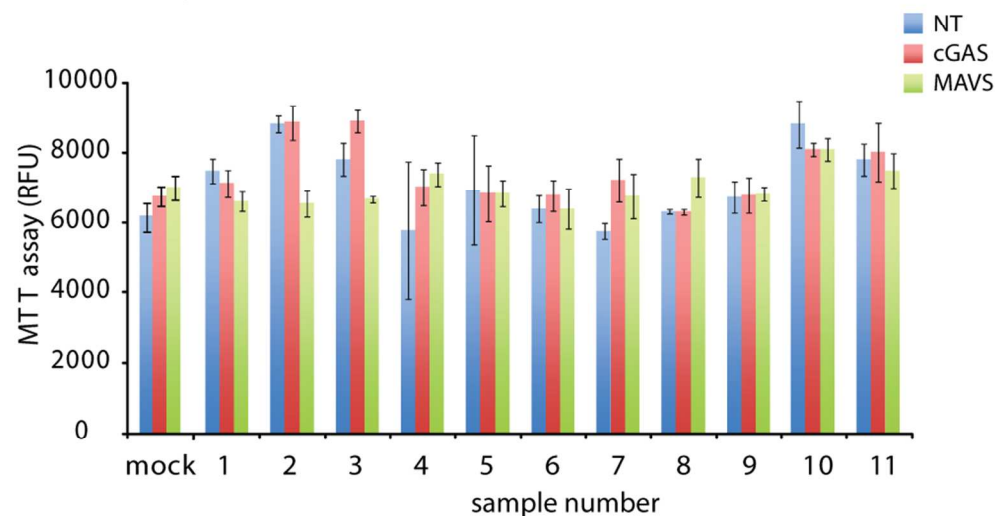

**Figure S7.** For IFN-activity experiments (a), THP-1 IFN reporter cells were depleted of cGAS or MAVS by siRNA and differentiated with PMA prior to experiments. Cells were transfected with indicated nucleic acids individually or in combination and secreted alkaline phosphatase activity was measured in culture supernatants 24 hours post-transfection. Cell viability (b) was assessed by MTT assay. Error bars denote SD; N=3.

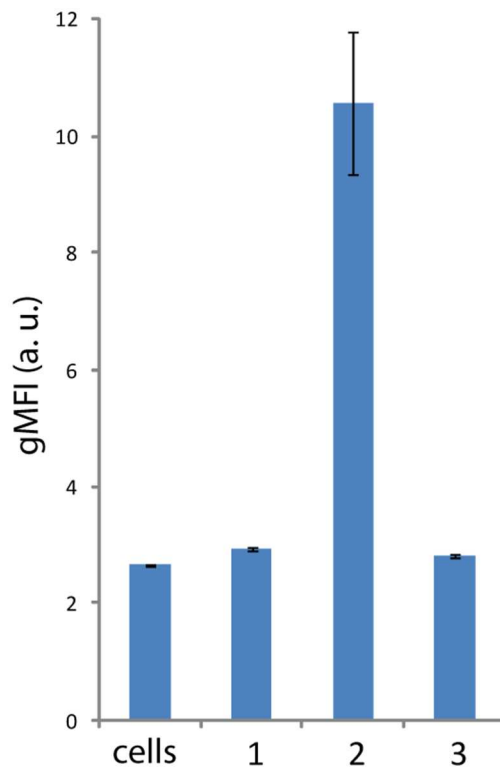

**Figure S8.** Cellular binding of fluorescently labeled RNA cubes functionalized with multiple DS RNAs and with DNA aptamer Sgc8c<sup>5, 6</sup> selected to specifically bind human protein tyrosine kinase-7 (PTK-7) presented on the cell surface of human acute lymphoblastic leukemia. CCRF-CEM cells were incubated at room temperature with (1) RNA cubes carrying 3 fluorescently labeled DS RNAs at 30 nM, (2) RNA cubes carrying 3 fluorescently labeled DS RNAs at 30 nM and one Sgc8c aptamers, and (3) Fluorescently labeled DS RNAs at three times higher concentration (100 nM). Samples were statistically analyzed 0.5 hour later using flow cytometry. The results demonstrate significant increase in cellular binding upon introduction of aptamer. More detailed studies on relative uptake and silencing efficiency with targeted RNA and/or DNA multifunctional nanoparticles are currently being conducted (Afonin et al. in preparation).

## References

1. Afonin, K. A.; Kasprzak, W. K.; Bindewald, E.; Puppala, P. S.; Diehl, A. R.; Hall, K. T.; Kim, T. J.; Zimmermann, M. T.; Jernigan, R. L.; Jaeger, L. *et al.* Computational and Experimental Characterization of Rna Cubic Nanoscaffolds. *Methods* **2014**.
2. Rose, S. D.; Kim, D. H.; Amarzguioui, M.; Heidel, J. D.; Collingwood, M. A.; Davis, M. E.; Rossi, J. J.; Behlke, M. A. Functional Polarity Is Introduced by Dicer Processing of Short Substrate Rnas. *Nucleic Acids Res* **2005**, 33, 4140-4156.
3. Low, J. T.; Knoepfel, S. A.; Watts, J. M.; ter Brake, O.; Berkhout, B.; Weeks, K. M. Shape-Directed Discovery of Potent Shrna Inhibitors of Hiv-1. *Mol Ther* **2012**, 20, 820-828.
4. Afonin, K. A.; Viard, M.; Martins, A. N.; Lockett, S. J.; Maciag, A. E.; Freed, E. O.; Heldman, E.; Jaeger, L.; Blumenthal, R.; Shapiro, B. A. Activation of Different Split Functionalities on Re-Association of Rna-DNA Hybrids. *Nat Nanotechnol* 8, 296-304.
5. Shangguan, D.; Li, Y.; Tang, Z.; Cao, Z. C.; Chen, H. W.; Mallikaratchy, P.; Sefah, K.; Yang, C. J.; Tan, W. Aptamers Evolved from Live Cells as Effective Molecular Probes for Cancer Study. *Proc Natl Acad Sci U S A* **2006**, 103, 11838-11843.
6. Shangguan, D.; Tang, Z.; Mallikaratchy, P.; Xiao, Z.; Tan, W. Optimization and Modifications of Aptamers Selected from Live Cancer Cell Lines. *Chembiochem* **2007**, 8, 603-606.
7. Afonin, K. A.; Grabow, W. W.; Walker, F. M.; Bindewald, E.; Dobrovolskaia, M. A.; Shapiro, B. A.; Jaeger, L. Design and Self-Assembly of Sirna-Functionalized Rna Nanoparticles for Use in Automated Nanomedicine. *Nat Protoc* **2011**, 6, 2022-2034.
